# Supplementary material
Source: Springer Nature journal article supplement (https://www.springermedizin.de/resource/supplementary/12883_2013_1143_MOESM3_ESM.pdf/9456404)
Supplement: MOESM3 [file 9456404]

Baseline MMSE  $\geq 20$ 

A

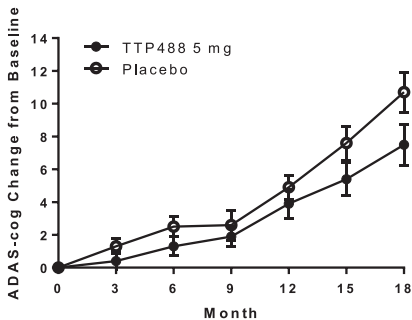

placebo n = 79 71 66 67 58 44  
TTP488 5mg n = 80 80 73 65 57 47

Baseline ADAS-cog  $\leq 19$ 

D

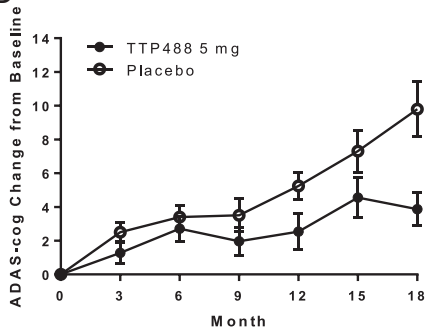

placebo n = 48 42 43 41 34 25  
TTP488 5mg n = 38 39 36 34 28 25

B

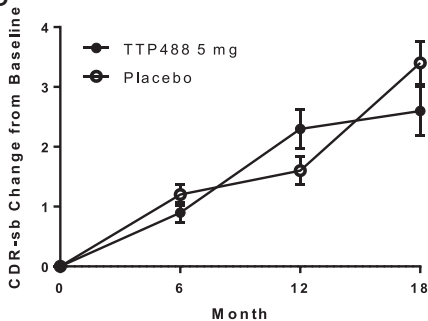

placebo n = 73 67 43  
TTP488 5mg n = 79 66 47

E

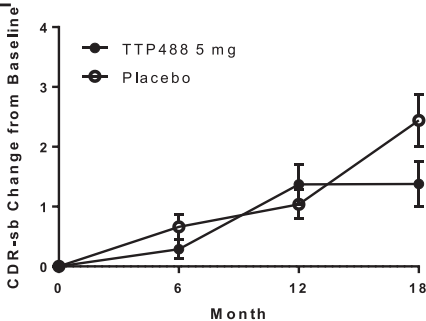

placebo n = 43 41 25  
TTP488 5mg n = 38 34 26

C

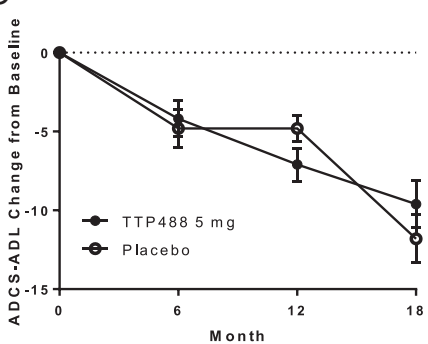

placebo n = 72 67 44  
TTP488 5mg n = 80 67 48

F

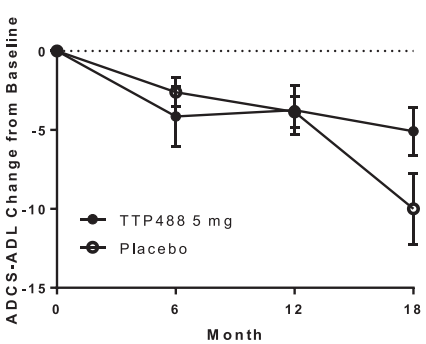

placebo n = 44 41 25  
TTP488 5mg n = 39 34 26
